# Supplementary material for: Exploring Natural Variations in Arabidopsis thaliana: Plant Adaptability to Salt Stress
Source: MDPI journal article supplement (doi:10.3390/plants13081069), 2024-04-10
Supplement: s1 [file s1]

**Table S1. Primers' list.**

| Gene   | Gene<br>Reference | Forward primer                    | Reverse primer                    | Ref. |
|--------|-------------------|-----------------------------------|-----------------------------------|------|
| RBOHD  | AT5G47910         | GTACACCCACCATTTGTTCATC            | AAAGCACGGAGCAGCCT                 | [43] |
| RBOHF  | AT1G64060         | GACACGCCAAGACGAAAGA               | ACACCCCGTTGGTCAAGTT               | [43] |
| SOD1   | AT3G10920         | GAACCTTGCTCCTTCCAGTG              | TCTTCAGTTCTTTGTCTAGTCCG           | [43] |
| CAT1   | AT1G20630         | GCCCCTAAATGTGCTCACC               | AAGCACTTCTCACGATTCCA              | [43] |
| APX1   | ATLG07890         | AGAAGGCTGTTGAGAAGTG               | CAGGGTGGAAAGGAATGT                | [45] |
| ACTIN7 | AT5G09810         | GGCCGATGGTGAGGATATTCAGCCACT<br>TG | TCGATGGACCTGACTCATCGTACTCACT<br>C | [43] |
